# Supplementary material for: Occurrence, Genetic Variability of Tomato Yellow Ring Orthotospovirus Population and the Development of Reverse Transcription Loop-Mediated Isothermal Amplification Assay for Its Rapid Detection
Source: MDPI journal article supplement (doi:10.3390/v14071405), 2022-06-27
Supplement: s1 [file s1]

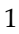

**Figure S1.** MCC tree constructed based on 50 TYRV full-length nucleocapsid (N). protein gene nucleotide sequences. Numbers above the branches represent Bayesian posterior probabilities (BPP).
