# Supplementary material for: Occurrence, Genetic Variability of Tomato Yellow Ring Orthotospovirus Population and the Development of Reverse Transcription Loop-Mediated Isothermal Amplification Assay for Its Rapid Detection
Source: Viruses. 2022 Jun 27;14(7):1405. doi: 10.3390/v14071405 (PMC9323093; doi:10.3390/v14071405)
Supplement: Supplementary file 1 [file viruses-14-01405-s001.zip › viruses-1740633-supplementary.xlsx]

## Sheet: Table S1
	Suplementary Table S1. List of TYRV isolates of which nucleocapsid (N) protein gene sequences were used in this study.
	Isolate name	Host	Country of orygin and colection date	Acc. No.	Reference
1	TYRV-KOR1	Solanum lycopersicum	Poland, 2021	OM654406	Obtained in this study
2	TYRV-KOR2	Solanum lycopersicum	Poland, 2021	OM654407	Obtained in this study
3	TYRV-H	Solanum lycopersicum	Poland, 2017	OM654405	Obtained in this study
4	TYRV-BK1	Solanum lycopersicum	Poland, 2014	KR139962	Zarzyńska-Nowak et al. 2015
5	TYRV-BK2	Solanum lycopersicum	Poland, 2014	KR139963	Zarzyńska-Nowak et al. 2015
6	TYRV-BK3	Solanum lycopersicum	Poland, 2014	KR139964	Zarzyńska-Nowak et al. 2015
7	TYRV-TK1	Solanum lycopersicum	Poland, 2013	KR139953	Zarzyńska-Nowak et al. 2015
8	TYRV-TK2	Solanum lycopersicum	Poland, 2013	KR139954	Zarzyńska-Nowak et al. 2015
9	TYRV-TK3	Solanum lycopersicum	Poland, 2013	KR139955	Zarzyńska-Nowak et al. 2015
10	TYRV-TK4	Solanum lycopersicum	Poland, 2013	KR139956	Zarzyńska-Nowak et al. 2015
11	TYRV-TK5	Solanum lycopersicum	Poland, 2013	KR139957	Zarzyńska-Nowak et al. 2015
12	TYRV-TK6	Solanum lycopersicum	Poland, 2013	KR139958	Zarzyńska-Nowak et al. 2015
13	TYRV-TK7	Solanum lycopersicum	Poland, 2013	KR139959	Zarzyńska-Nowak et al. 2015
14	TYRV-TK8	Solanum lycopersicum	Poland, 2013	KR139960	Zarzyńska-Nowak et al. 2015
15	TYRV-TK9	Solanum lycopersicum	Poland, 2013	KR139961	Zarzyńska-Nowak et al. 2015
16	TYRV-Tom1M	Solanum lycopersicum	Iran, 2015	KX611800	Bayat et al. (unpublished)
17	TYRV-t/TR-Tom9*	Solanum lycopersicum	Iran, 2009	HQ154131	Beikzadeh et al. (unpublished)
18	TY-TT94	Solanum lycopersicum	Iran, 2006	MF574028	Golnaraghi (unpublished)
19	TYRV-t/TY-Tom1	Solanum lycopersicum	Iran, 2002	AJ493270	Hassani-Mehraban et al. 2005, Winter et al. 2006
20	TYRV-t/TR-Tom2	Solanum lycopersicum	Iran, 2002	AY686718	Hassani-Mehraban et al. 2005
21	DSMZ PV-0526	Solanum lycopersicum	Iran	MT723996	German Collection of Microorganisms and Cell Cultures
22	TYRV-TS/TR-Tom6	Solanum lycopersicum	Iran	DQ810195	Rasoulpour and Izadpanah 2007
23	TYRV-Tri1M	Tropaeolum majus	Iran, 2015	KX611798	Bayat et al. (unpublished)
24	TYRV-Tob2M	Nicotiana tabacum	Iran, 2014	KX611799	Bayat et al. (unpublished)
25	TY-PepT74	Capsicum annuum	Iran, 2011	KC354693	Golnaraghi et al. 2013
26	TY-PepT43	Capsicum annuum	Iran, 2010	KC354692	Golnaraghi et al. 2013
27	TYRV-t/TR-Als10	Alstroemeria sp	Iran, 2009	HQ154130	Beikzadeh et al. 2012
28	TYRV-Alstroemeria/TR-ALS11	Alstroemeria sp	Iran, 2009	FJ970490	Beikzadeh et al. 2012
29	TY-ChrT31	Chrysanthemum sp	Iran, 2006	MF574027	Golnaraghi (unpublished)
30	TYRV-t TR-Chr7	Chrysanthemum sp	Iran, 2002	JF836810	Hassani-Mehraban et al. (unpublished)
31	TY-PH60	Solanum tuberosum	Iran, 2006	JF750346	Golnaraghi et al.. 2008
32	TY-PH132	Solanum tuberosum	Iran, 2006	JF750344	Golnaraghi et al.. 2008
33	TY-PK95	Solanum tuberosum	Iran, 2006	JF750342	Golnaraghi et al.. 2008
34	TY-PT108	Solanum tuberosum	Iran, 2006	JF750340	Golnaraghi et al.. 2008
35	TY-PK28	Solanum tuberosum	Iran, 2006	JF750338	Golnaraghi et al.. 2008
36	TY-PT65	Solanum tuberosum	Iran, 2006	JF750336	Golnaraghi et al.. 2008
37	TY-PE14	Solanum tuberosum	Iran, 2005	JF750345	Golnaraghi et al.. 2008
38	TY-PAr72	Solanum tuberosum	Iran, 2005	JF750337	Golnaraghi et al.. 2008
39	TY-PL89	Solanum tuberosum	Iran, 2005	JF750343	Golnaraghi et al.. 2008
40	TY-PKh116	Solanum tuberosum	Iran, 2005	JF750341	Golnaraghi et al.. 2008
41	TY-PAzs121	Solanum tuberosum	Iran, 2005	JF750339	Golnaraghi et al.. 2008
42	TY-PF36	Solanum tuberosum	Iran, 2004	EU126931	Golnaraghi et al.. 2008
43	TY-PF12	Solanum tuberosum	Iran, 2004	DQ419916	Golnaraghi et al. (unpublished)
44	TYRV-s/TY-Pot12	Solanum tuberosum	Iran, 2002	JF836812	Hassani-Mehraban et al. (unpublished)
45	TY-PeM61	Arachis hypogaea	Iran, 2005	MF574034	Golnaraghi et al.. 2018
46	TY-PeM55	Arachis hypogaea	Iran, 2005	MF574033	Golnaraghi et al.. 2018
47	TY-PeG28	Arachis hypogaea	Iran, 2004	MF574032	Golnaraghi et al.. 2018
48	TY-PeG53	Arachis hypogaea	Iran, 2004	MF574031	Golnaraghi et al.. 2018
49	TY-PeG14	Arachis hypogaea	Iran, 2004	MF574030	Golnaraghi et al.. 2018
50	TY-SG173	Arachis hypogaea	Iran, 2004	MF574029	Golnaraghi (unpublished)
51	TY-SM23	Glycine max	Iran, 2004	EF157855	Golnaraghi et al. (unpublished)
52	TYRV-s/TR-Soy3	Glicyne max	Iran	DQ462163	Hassani-Mehraban et al. 2007
53	TYRV-t/TR-Gaz8	Gazania sp	Iran, 2002	JF836811	Hassani-Mehraban et al. (unpublished)
54	TYRV-A/TR-Ane4	Anemone	Iran	DQ788694	Rasoulpour and Izadpanah 2007
55	TYRV-CI/TR-Cin5	Cineraria cruenta	Iran, 2000	DQ788693	Rasoulpour and Izadpanah 2007
	*Double names of some isolates corresponds to names entitled the appropriative isolates in Gene Bank and named by Golnaraghi et al. in their work (2018)

## Sheet: Table S2
	Suplementary Table S2. Percentage of nucleotide (bottom part of table, nt) and aminoacid (upper part of table, aa) sequences identity of nucleocapsid (N) protein gene sequences of Polish TYRV isolates
		TYRV-H	TYRV-KOR1	TYRV-KOR2	TYRV-BK3	TYRV-BK2	TYRV-BK1	TYRV-TK9	TYRV-TK8	TYRV-TK7	TYRV-TK6	TYRV-TK5	TYRV-TK4	TYRV-TK3	TYRV-TK2	TYRV-TK1
	TYRV-H	ID	0.989	0.989	0.992	0.996	0.989	0.989	0.989	0.985	0.985	0.992	0.985	0.992	0.992	0.992
	TYRV-KOR1	0.993	ID	0.992	0.989	0.992	0.992	0.992	0.992	0.989	0.989	0.996	0.996	0.996	0.996	0.996
	TYRV-KOR2	0.995	0.996	ID	0.989	0.992	0.992	0.992	0.992	0.989	0.989	0.996	0.989	0.996	0.996	0.996
	TYRV-BK3	0.996	0.995	0.996	ID	0.996	0.989	0.989	0.989	0.985	0.985	0.992	0.985	0.992	0.992	0.992
	TYRV-BK2	0.997	0.996	0.997	0.998	ID	0.992	0.992	0.992	0.989	0.989	0.996	0.989	0.996	0.996	0.996
	TYRV-BK1	0.995	0.996	0.997	0.996	0.997	ID	0.992	0.992	0.989	0.989	0.996	0.989	0.996	0.996	0.996
	TYRV-TK9	0.992	0.992	0.993	0.993	0.995	0.993	ID	0.992	0.989	0.989	0.996	0.989	0.996	0.996	0.996
	TYRV-TK8	0.993	0.995	0.996	0.995	0.996	0.996	0.992	ID	0.989	0.992	0.996	0.989	0.996	0.996	0.996
	TYRV-TK7	0.993	0.995	0.996	0.995	0.996	0.996	0.992	0.995	ID	0.985	0.992	0.985	0.992	0.992	0.992
	TYRV-TK6	0.992	0.993	0.995	0.993	0.995	0.995	0.991	0.993	0.993	ID	0.992	0.985	0.992	0.992	0.992
	TYRV-TK5	0.993	0.995	0.996	0.995	0.996	0.996	0.992	0.995	0.995	0.993	ID	0.992	1	1	1
	TYRV-TK4	0.993	0.997	0.996	0.995	0.996	0.996	0.992	0.995	0.995	0.993	0.995	ID	0.992	0.992	0.992
	TYRV-TK3	0.996	0.997	0.998	0.997	0.998	0.998	0.995	0.997	0.997	0.996	0.997	0.997	ID	1	1
	TYRV-TK2	0.995	0.996	0.997	0.996	0.997	0.997	0.993	0.996	0.996	0.995	0.998	0.996	0.998	ID	1
	TYRV-TK1	0.995	0.996	0.997	0.996	0.997	0.997	0.993	0.996	0.996	0.995	0.996	0.996	0.998	0.997	ID

## Sheet: Table S3
	Supplementary Table S3. Number of mutations observed in the nucleocapsid (N) protein gene sequences of the TYRV Polish isolates, in comparison to TYRV-TK1 sequence
		TYRV-TK1 N gene sequence
		NS	S	Total
	TYRV-KOR1	2	1	3
	TYRV-KOR2	1	1	2
	TYRV-H	2	2	4
	TYRV-BK1	1	1	2
	TYRV-BK2	1	1	2
	TYRV-BK3	1	2	3
	TYRV-TK2	2	0	2
	TYRV-TK3	1	0	1
	TYRV-TK4	1	2	3
	TYRV-TK5	3	0	3
	TYRV-TK6	2	2	4
	TYRV-TK7	2	1	3
	TYRV-TK8	2	1	3
	TYRV-TK9	4	1	5
	Total	25	15	40
	* NS nonsynonymous mutation, S synonymous

## Sheet: Table S4
	aa	Supplementary Table S4. Percentage of nucleotide (bottom part of table, nt) and aminoacid (upper part of table, aa) sequences identity of N gene sequences of 55 analyzed TYRV isolates
	nt	TYRV H	TYRV KOR1	TYRV KOR2	TYRV BK3	TYRV BK1	TYRV BK2	TYRV TK9	TYRV TK8	TYRV TK7	TYRV TK6	TYRV TK5	TYRV TK4	TYRV TK3	TYRV TK2	TYRV TK1	TYRV Tom1M	TYRV Tob2M	TYRV Tri1M	TY Pot12	TR Gaz8	TR Chr7	TR Tom9	TR Als10	TR Tom6	TR Ane4	TYRV CI	TR ALS11	TR Soy3	DSMZ PV 0526	TR Tom2	TY PeM61	TY PeM55	TY PeG28	TY PeG53	TY PeG14	TY SG173	TY TT94	TY ChrT31	TY PH60	TY PE14	TY PH132	TY PL89	TY PK95	TY PKh116	TY PT108	TY PAzs121	TY PK28	TY PAr72
	TYRV H	ID	0.989	0.989	0.992	0.989	0.996	0.989	0.989	0.985	0.985	0.992	0.985	0.992	0.992	0.992	0.912	0.905	0.901	0.941	0.901	0.912	0.908	0.912	0.912	0.905	0.897	0.908	0.934	0.912	0.905	0.934	0.937	0.93	0.934	0.934	0.937	0.901	0.908	0.937	0.937	0.937	0.934	0.937	0.937	0.934	0.93	0.908	0.908
	TYRV KOR1	0.993	ID	0.992	0.989	0.992	0.992	0.992	0.992	0.989	0.989	0.996	0.996	0.996	0.996	0.996	0.919	0.912	0.908	0.952	0.908	0.919	0.916	0.919	0.919	0.912	0.905	0.916	0.945	0.919	0.912	0.945	0.948	0.941	0.945	0.945	0.948	0.908	0.916	0.948	0.948	0.948	0.945	0.948	0.948	0.945	0.941	0.916	0.916
	TYRV KOR2	0.995	0.996	ID	0.989	0.992	0.992	0.992	0.992	0.989	0.989	0.996	0.989	0.996	0.996	0.996	0.916	0.908	0.905	0.948	0.905	0.916	0.912	0.916	0.916	0.908	0.901	0.912	0.941	0.916	0.908	0.941	0.945	0.937	0.941	0.941	0.945	0.905	0.912	0.945	0.945	0.945	0.941	0.945	0.945	0.941	0.937	0.912	0.912
	TYRV BK3	0.996	0.995	0.996	ID	0.989	0.996	0.989	0.989	0.985	0.985	0.992	0.985	0.992	0.992	0.992	0.912	0.905	0.901	0.941	0.901	0.912	0.908	0.912	0.912	0.905	0.897	0.908	0.934	0.912	0.908	0.934	0.937	0.93	0.934	0.934	0.937	0.901	0.908	0.937	0.937	0.937	0.934	0.937	0.937	0.934	0.93	0.908	0.908
	TYRV BK1	0.995	0.996	0.997	0.996	ID	0.992	0.992	0.992	0.989	0.989	0.996	0.989	0.996	0.996	0.996	0.912	0.905	0.901	0.945	0.901	0.912	0.908	0.912	0.912	0.905	0.897	0.908	0.937	0.912	0.905	0.937	0.941	0.934	0.937	0.937	0.941	0.901	0.908	0.941	0.941	0.941	0.937	0.941	0.941	0.937	0.934	0.908	0.908
	TYRV BK2	0.997	0.996	0.997	0.998	0.997	ID	0.992	0.992	0.989	0.989	0.996	0.989	0.996	0.996	0.996	0.916	0.908	0.905	0.945	0.905	0.916	0.912	0.916	0.916	0.908	0.901	0.912	0.937	0.916	0.908	0.937	0.941	0.934	0.937	0.937	0.941	0.905	0.912	0.941	0.941	0.941	0.937	0.941	0.941	0.937	0.934	0.912	0.912
	TYRV TK9	0.992	0.992	0.993	0.993	0.993	0.995	ID	0.992	0.989	0.989	0.996	0.989	0.996	0.996	0.996	0.912	0.905	0.901	0.945	0.901	0.912	0.908	0.912	0.912	0.905	0.897	0.908	0.937	0.912	0.905	0.937	0.941	0.934	0.937	0.937	0.941	0.901	0.908	0.941	0.941	0.941	0.937	0.941	0.941	0.937	0.934	0.908	0.908
	TYRV TK8	0.993	0.995	0.996	0.995	0.996	0.996	0.992	ID	0.989	0.992	0.996	0.989	0.996	0.996	0.996	0.912	0.905	0.901	0.945	0.901	0.912	0.908	0.912	0.912	0.905	0.897	0.908	0.937	0.912	0.905	0.937	0.941	0.934	0.937	0.937	0.941	0.901	0.908	0.941	0.941	0.941	0.937	0.941	0.941	0.937	0.934	0.908	0.908
	TYRV TK7	0.993	0.995	0.996	0.995	0.996	0.996	0.992	0.995	ID	0.985	0.992	0.985	0.992	0.992	0.992	0.908	0.901	0.897	0.941	0.897	0.908	0.905	0.908	0.908	0.901	0.894	0.905	0.934	0.908	0.901	0.934	0.937	0.93	0.934	0.934	0.937	0.897	0.905	0.937	0.937	0.937	0.934	0.937	0.937	0.934	0.934	0.905	0.905
	TYRV TK6	0.992	0.993	0.995	0.993	0.995	0.995	0.991	0.993	0.993	ID	0.992	0.985	0.992	0.992	0.992	0.908	0.901	0.897	0.941	0.897	0.908	0.905	0.908	0.908	0.901	0.894	0.905	0.934	0.908	0.901	0.934	0.937	0.93	0.934	0.934	0.937	0.897	0.905	0.937	0.937	0.937	0.934	0.937	0.937	0.934	0.93	0.905	0.905
	TYRV TK5	0.993	0.995	0.996	0.995	0.996	0.996	0.992	0.995	0.995	0.993	ID	0.992	1	1	1	0.916	0.908	0.905	0.948	0.905	0.916	0.912	0.916	0.916	0.908	0.901	0.912	0.941	0.916	0.908	0.941	0.945	0.937	0.941	0.941	0.945	0.905	0.912	0.945	0.945	0.945	0.941	0.945	0.945	0.941	0.937	0.912	0.912
	TYRV TK4	0.993	0.997	0.996	0.995	0.996	0.996	0.992	0.995	0.995	0.993	0.995	ID	0.992	0.992	0.992	0.916	0.908	0.905	0.948	0.905	0.916	0.912	0.916	0.916	0.908	0.901	0.912	0.941	0.916	0.908	0.941	0.945	0.937	0.941	0.941	0.945	0.905	0.912	0.945	0.945	0.945	0.941	0.945	0.945	0.941	0.937	0.912	0.912
	TYRV TK3	0.996	0.997	0.998	0.997	0.998	0.998	0.995	0.997	0.997	0.996	0.997	0.997	ID	1	1	0.916	0.908	0.905	0.948	0.905	0.916	0.912	0.916	0.916	0.908	0.901	0.912	0.941	0.916	0.908	0.941	0.945	0.937	0.941	0.941	0.945	0.905	0.912	0.945	0.945	0.945	0.941	0.945	0.945	0.941	0.937	0.912	0.912
	TYRV TK2	0.995	0.996	0.997	0.996	0.997	0.997	0.993	0.996	0.996	0.995	0.998	0.996	0.998	ID	1	0.916	0.908	0.905	0.948	0.905	0.916	0.912	0.916	0.916	0.908	0.901	0.912	0.941	0.916	0.908	0.941	0.945	0.937	0.941	0.941	0.945	0.905	0.912	0.945	0.945	0.945	0.941	0.945	0.945	0.941	0.937	0.912	0.912
	TYRV TK1	0.995	0.996	0.997	0.996	0.997	0.997	0.993	0.996	0.996	0.995	0.996	0.996	0.998	0.997	ID	0.916	0.908	0.905	0.948	0.905	0.916	0.912	0.916	0.916	0.908	0.901	0.912	0.941	0.916	0.908	0.941	0.945	0.937	0.941	0.941	0.945	0.905	0.912	0.945	0.945	0.945	0.941	0.945	0.945	0.941	0.937	0.912	0.912
	TYRV Tom1M	0.849	0.852	0.854	0.85	0.851	0.851	0.847	0.85	0.85	0.849	0.855	0.852	0.852	0.854	0.851	ID	0.985	0.989	0.927	0.989	0.996	0.992	0.996	0.992	0.992	0.981	0.996	0.919	0.989	0.992	0.919	0.93	0.916	0.919	0.919	0.923	0.989	0.992	0.923	0.923	0.923	0.919	0.923	0.923	0.919	0.916	0.996	0.996
	TYRV Tob2M	0.84	0.844	0.845	0.841	0.843	0.843	0.839	0.841	0.841	0.84	0.844	0.844	0.844	0.843	0.843	0.97	ID	0.974	0.927	0.974	0.981	0.978	0.981	0.992	0.985	0.974	0.989	0.919	0.981	0.978	0.919	0.93	0.916	0.919	0.919	0.923	0.981	0.985	0.923	0.923	0.923	0.919	0.923	0.923	0.919	0.916	0.989	0.989
	TYRV Tri1M	0.844	0.847	0.849	0.845	0.846	0.846	0.843	0.845	0.845	0.844	0.85	0.847	0.847	0.849	0.846	0.995	0.965	ID	0.916	0.978	0.985	0.981	0.985	0.981	0.981	0.97	0.985	0.908	0.978	0.981	0.908	0.919	0.905	0.908	0.908	0.912	0.978	0.981	0.912	0.912	0.912	0.908	0.912	0.912	0.908	0.905	0.985	0.985
	TY Pot12	0.895	0.899	0.897	0.896	0.897	0.897	0.894	0.896	0.897	0.895	0.896	0.899	0.899	0.897	0.897	0.861	0.869	0.856	ID	0.916	0.927	0.923	0.927	0.934	0.927	0.923	0.93	0.992	0.93	0.919	0.985	0.996	0.989	0.985	0.992	0.989	0.923	0.93	0.989	0.989	0.989	0.985	0.989	0.996	0.992	0.981	0.93	0.93
	TR Gaz8	0.844	0.847	0.849	0.845	0.846	0.846	0.843	0.845	0.845	0.844	0.85	0.847	0.847	0.849	0.846	0.987	0.963	0.982	0.857	ID	0.985	0.981	0.985	0.981	0.981	0.97	0.985	0.908	0.978	0.981	0.916	0.919	0.908	0.908	0.908	0.912	0.978	0.981	0.912	0.912	0.912	0.908	0.912	0.912	0.908	0.905	0.985	0.985
	TR Chr7	0.846	0.85	0.851	0.847	0.849	0.849	0.845	0.847	0.847	0.846	0.85	0.85	0.85	0.849	0.849	0.975	0.958	0.97	0.858	0.973	ID	0.989	0.992	0.989	0.989	0.978	0.992	0.919	0.985	0.989	0.919	0.93	0.916	0.919	0.919	0.923	0.985	0.989	0.923	0.923	0.923	0.919	0.923	0.923	0.919	0.916	0.992	0.992
	TR Tom9	0.85	0.854	0.855	0.851	0.852	0.852	0.849	0.851	0.851	0.85	0.854	0.854	0.854	0.852	0.852	0.984	0.964	0.979	0.869	0.976	0.969	ID	0.996	0.985	0.985	0.981	0.989	0.916	0.989	0.985	0.916	0.927	0.912	0.916	0.916	0.919	0.981	0.992	0.919	0.919	0.919	0.916	0.919	0.919	0.916	0.912	0.989	0.989
	TR Als10	0.847	0.851	0.852	0.849	0.85	0.85	0.846	0.849	0.849	0.847	0.851	0.851	0.851	0.85	0.85	0.987	0.968	0.982	0.866	0.98	0.973	0.993	ID	0.989	0.989	0.985	0.992	0.919	0.992	0.989	0.919	0.93	0.916	0.919	0.919	0.923	0.985	0.996	0.923	0.923	0.923	0.919	0.923	0.923	0.919	0.916	0.992	0.992
	TR Tom6	0.844	0.847	0.849	0.845	0.846	0.846	0.843	0.845	0.845	0.844	0.847	0.847	0.847	0.846	0.846	0.975	0.967	0.97	0.867	0.972	0.976	0.968	0.972	ID	0.992	0.981	0.996	0.927	0.989	0.985	0.927	0.937	0.923	0.927	0.927	0.93	0.989	0.992	0.93	0.93	0.93	0.927	0.93	0.93	0.927	0.923	0.996	0.996
	TR Ane4	0.844	0.847	0.849	0.845	0.846	0.846	0.843	0.845	0.845	0.844	0.85	0.847	0.847	0.849	0.846	0.995	0.973	0.99	0.862	0.987	0.975	0.984	0.987	0.976	ID	0.981	0.996	0.919	0.989	0.985	0.919	0.93	0.916	0.919	0.919	0.923	0.989	0.992	0.923	0.923	0.923	0.919	0.923	0.923	0.919	0.916	0.996	0.996
	TYRV CI	0.843	0.846	0.847	0.844	0.845	0.845	0.841	0.844	0.844	0.843	0.846	0.846	0.846	0.845	0.845	0.975	0.961	0.97	0.861	0.968	0.973	0.974	0.975	0.969	0.978	ID	0.985	0.916	0.985	0.974	0.912	0.927	0.912	0.912	0.916	0.916	0.978	0.989	0.916	0.916	0.916	0.912	0.916	0.919	0.916	0.908	0.985	0.985
	TR ALS11	0.847	0.851	0.852	0.849	0.85	0.85	0.846	0.849	0.849	0.847	0.851	0.851	0.851	0.85	0.85	0.976	0.963	0.972	0.871	0.973	0.978	0.969	0.973	0.989	0.978	0.97	ID	0.923	0.992	0.989	0.923	0.934	0.919	0.923	0.923	0.927	0.992	0.996	0.927	0.927	0.927	0.923	0.927	0.927	0.923	0.919	1	1
	TR Soy3	0.892	0.896	0.895	0.894	0.895	0.895	0.891	0.894	0.895	0.892	0.894	0.896	0.896	0.895	0.895	0.858	0.867	0.854	0.997	0.855	0.856	0.867	0.863	0.864	0.86	0.858	0.868	ID	0.923	0.912	0.978	0.989	0.989	0.978	0.992	0.981	0.916	0.923	0.981	0.981	0.981	0.978	0.981	0.989	1	0.974	0.923	0.923
	DSMZ PV 0526	0.847	0.851	0.852	0.849	0.85	0.85	0.846	0.849	0.849	0.847	0.851	0.851	0.851	0.85	0.85	0.98	0.968	0.975	0.866	0.973	0.975	0.976	0.98	0.974	0.982	0.978	0.978	0.863	ID	0.981	0.923	0.934	0.919	0.923	0.923	0.927	0.985	0.996	0.927	0.927	0.927	0.923	0.927	0.927	0.923	0.919	0.992	0.992
	TR Tom2	0.845	0.849	0.85	0.847	0.847	0.847	0.844	0.846	0.846	0.845	0.849	0.849	0.849	0.847	0.847	0.973	0.956	0.968	0.857	0.97	0.995	0.967	0.97	0.974	0.973	0.97	0.975	0.855	0.973	ID	0.912	0.923	0.908	0.912	0.912	0.916	0.981	0.985	0.916	0.916	0.916	0.912	0.916	0.916	0.912	0.908	0.989	0.989
	TY PeM61	0.901	0.905	0.903	0.902	0.903	0.903	0.9	0.902	0.903	0.901	0.902	0.905	0.905	0.903	0.903	0.866	0.874	0.861	0.972	0.866	0.867	0.873	0.872	0.872	0.868	0.867	0.873	0.969	0.869	0.866	ID	0.981	0.974	0.992	0.978	0.996	0.916	0.923	0.996	0.996	0.996	0.992	0.996	0.981	0.978	0.989	0.923	0.923
	TY PeM55	0.895	0.899	0.897	0.896	0.897	0.897	0.894	0.896	0.897	0.895	0.896	0.899	0.899	0.897	0.897	0.863	0.869	0.858	0.997	0.86	0.861	0.872	0.868	0.867	0.864	0.863	0.871	0.995	0.868	0.86	0.969	ID	0.985	0.981	0.989	0.985	0.927	0.934	0.985	0.985	0.985	0.981	0.985	0.992	0.989	0.978	0.934	0.934
	TY PeG28	0.892	0.896	0.895	0.894	0.895	0.895	0.891	0.894	0.895	0.892	0.894	0.896	0.896	0.895	0.895	0.858	0.864	0.854	0.995	0.855	0.856	0.867	0.863	0.862	0.86	0.858	0.866	0.995	0.863	0.855	0.967	0.995	ID	0.974	0.981	0.978	0.912	0.919	0.978	0.978	0.978	0.974	0.978	0.985	0.989	0.97	0.919	0.919
	TY PeG53	0.901	0.905	0.903	0.902	0.903	0.903	0.9	0.902	0.903	0.901	0.902	0.905	0.905	0.903	0.903	0.866	0.874	0.861	0.974	0.863	0.867	0.873	0.872	0.872	0.868	0.867	0.873	0.972	0.869	0.866	0.995	0.972	0.969	ID	0.978	0.996	0.916	0.923	0.996	0.996	0.996	0.992	0.996	0.981	0.978	0.989	0.923	0.923
	TY PeG14	0.892	0.896	0.895	0.894	0.895	0.895	0.891	0.894	0.895	0.892	0.894	0.896	0.896	0.895	0.895	0.858	0.867	0.854	0.997	0.855	0.856	0.867	0.863	0.864	0.86	0.858	0.868	0.997	0.863	0.855	0.969	0.995	0.992	0.972	ID	0.981	0.916	0.923	0.981	0.981	0.981	0.978	0.981	0.996	0.992	0.974	0.923	0.923
	TY SG173	0.901	0.905	0.903	0.902	0.903	0.903	0.9	0.902	0.903	0.901	0.902	0.905	0.905	0.903	0.903	0.863	0.872	0.858	0.979	0.861	0.864	0.873	0.869	0.869	0.866	0.864	0.873	0.976	0.867	0.863	0.992	0.976	0.974	0.995	0.976	ID	0.919	0.927	1	1	1	0.996	1	0.985	0.981	0.992	0.927	0.927
	TY TT94	0.845	0.849	0.85	0.846	0.847	0.847	0.844	0.846	0.846	0.845	0.849	0.849	0.849	0.847	0.847	0.974	0.961	0.969	0.866	0.97	0.975	0.967	0.97	0.986	0.975	0.968	0.995	0.863	0.975	0.973	0.868	0.866	0.861	0.868	0.863	0.868	ID	0.989	0.919	0.919	0.919	0.916	0.919	0.919	0.916	0.912	0.992	0.992
	TY ChrT31	0.851	0.855	0.856	0.852	0.854	0.854	0.85	0.852	0.852	0.851	0.855	0.855	0.855	0.854	0.854	0.981	0.967	0.976	0.867	0.976	0.981	0.98	0.981	0.978	0.984	0.991	0.979	0.864	0.984	0.979	0.873	0.869	0.864	0.873	0.864	0.871	0.976	ID	0.927	0.927	0.927	0.923	0.927	0.927	0.923	0.919	0.996	0.996
	TY PH60	0.902	0.906	0.905	0.903	0.905	0.905	0.901	0.903	0.905	0.902	0.903	0.906	0.906	0.905	0.905	0.867	0.875	0.862	0.975	0.864	0.868	0.874	0.873	0.873	0.869	0.868	0.874	0.973	0.871	0.867	0.996	0.973	0.97	0.998	0.973	0.996	0.869	0.874	ID	1	1	0.996	1	0.985	0.981	0.992	0.927	0.927
	TY PE14	0.902	0.906	0.905	0.903	0.905	0.905	0.901	0.903	0.905	0.902	0.903	0.906	0.906	0.905	0.905	0.867	0.875	0.862	0.975	0.864	0.868	0.874	0.873	0.873	0.869	0.868	0.874	0.973	0.871	0.867	0.996	0.973	0.97	0.998	0.973	0.996	0.869	0.874	1	ID	1	0.996	1	0.985	0.981	0.992	0.927	0.927
	TY PH132	0.902	0.906	0.905	0.903	0.905	0.905	0.901	0.903	0.905	0.902	0.903	0.906	0.906	0.905	0.905	0.867	0.875	0.862	0.975	0.864	0.868	0.874	0.873	0.873	0.869	0.868	0.874	0.973	0.871	0.867	0.996	0.973	0.97	0.998	0.973	0.996	0.869	0.874	1	1	ID	0.996	1	0.985	0.981	0.992	0.927	0.927
	TY PL89	0.901	0.905	0.903	0.902	0.903	0.903	0.9	0.902	0.903	0.901	0.902	0.905	0.905	0.903	0.903	0.866	0.874	0.861	0.974	0.863	0.867	0.873	0.872	0.872	0.868	0.867	0.873	0.972	0.869	0.866	0.995	0.972	0.969	0.997	0.972	0.995	0.868	0.873	0.998	0.998	0.998	ID	0.996	0.981	0.978	0.989	0.923	0.923
	TY PK95	0.902	0.906	0.905	0.903	0.905	0.905	0.901	0.903	0.905	0.902	0.903	0.906	0.906	0.905	0.905	0.867	0.875	0.862	0.975	0.864	0.868	0.874	0.873	0.873	0.869	0.868	0.874	0.973	0.871	0.867	0.996	0.973	0.97	0.998	0.973	0.996	0.869	0.874	1	1	1	0.998	ID	0.985	0.981	0.992	0.927	0.927
	TY PKh116	0.895	0.899	0.897	0.896	0.897	0.897	0.894	0.896	0.897	0.895	0.896	0.899	0.899	0.897	0.897	0.861	0.867	0.856	0.997	0.857	0.858	0.869	0.866	0.864	0.862	0.861	0.868	0.995	0.866	0.857	0.969	0.997	0.995	0.972	0.997	0.976	0.863	0.867	0.973	0.973	0.973	0.972	0.973	ID	0.989	0.978	0.927	0.927
	TY PT108	0.892	0.896	0.895	0.894	0.895	0.895	0.891	0.894	0.895	0.892	0.894	0.896	0.896	0.895	0.895	0.858	0.867	0.854	0.997	0.855	0.856	0.867	0.863	0.864	0.86	0.858	0.868	1	0.863	0.855	0.969	0.995	0.995	0.972	0.997	0.976	0.863	0.864	0.973	0.973	0.973	0.972	0.973	0.995	ID	0.974	0.923	0.923
	TY PAzs121	0.9	0.903	0.902	0.901	0.902	0.902	0.899	0.901	0.902	0.9	0.901	0.903	0.903	0.902	0.902	0.864	0.873	0.86	0.973	0.862	0.866	0.872	0.871	0.871	0.867	0.866	0.872	0.97	0.868	0.864	0.993	0.97	0.968	0.996	0.97	0.993	0.867	0.872	0.997	0.997	0.997	0.996	0.997	0.97	0.97	ID	0.919	0.919
	TY PK28	0.846	0.85	0.851	0.847	0.849	0.849	0.845	0.847	0.847	0.846	0.852	0.85	0.85	0.851	0.849	0.995	0.975	0.99	0.864	0.987	0.978	0.986	0.99	0.979	0.997	0.98	0.98	0.862	0.985	0.975	0.871	0.867	0.862	0.871	0.862	0.868	0.978	0.986	0.872	0.872	0.872	0.871	0.872	0.864	0.862	0.869	ID	1
	TY PAr72	0.846	0.85	0.851	0.847	0.849	0.849	0.845	0.847	0.847	0.846	0.85	0.85	0.85	0.849	0.849	0.978	0.964	0.973	0.869	0.974	0.979	0.97	0.974	0.99	0.979	0.972	0.998	0.867	0.979	0.976	0.872	0.869	0.864	0.872	0.867	0.872	0.996	0.98	0.873	0.873	0.873	0.872	0.873	0.867	0.867	0.871	0.981	ID
	TY PT65	0.847	0.851	0.852	0.85	0.85	0.85	0.846	0.849	0.849	0.847	0.851	0.851	0.851	0.85	0.85	0.975	0.958	0.97	0.858	0.973	0.992	0.969	0.973	0.976	0.975	0.973	0.978	0.856	0.975	0.997	0.867	0.861	0.856	0.867	0.856	0.864	0.975	0.981	0.868	0.868	0.868	0.867	0.868	0.858	0.856	0.866	0.978	0.979
	TY PepT74	0.895	0.899	0.897	0.896	0.897	0.897	0.894	0.896	0.897	0.895	0.896	0.899	0.899	0.897	0.897	0.861	0.869	0.856	0.989	0.858	0.86	0.871	0.867	0.867	0.863	0.862	0.871	0.989	0.864	0.858	0.978	0.986	0.984	0.98	0.989	0.982	0.866	0.868	0.981	0.981	0.981	0.982	0.981	0.986	0.989	0.979	0.866	0.869
	TY PepT43	0.895	0.899	0.897	0.896	0.897	0.897	0.894	0.896	0.897	0.895	0.896	0.899	0.899	0.897	0.897	0.858	0.867	0.854	0.995	0.855	0.856	0.867	0.863	0.864	0.86	0.858	0.868	0.992	0.863	0.855	0.974	0.992	0.992	0.976	0.992	0.981	0.863	0.864	0.978	0.978	0.978	0.976	0.978	0.992	0.992	0.975	0.862	0.867
	TY PF36	0.894	0.897	0.896	0.895	0.896	0.896	0.892	0.895	0.896	0.894	0.895	0.897	0.897	0.896	0.896	0.86	0.866	0.855	0.996	0.856	0.857	0.868	0.864	0.863	0.861	0.86	0.867	0.993	0.864	0.856	0.968	0.996	0.998	0.97	0.993	0.975	0.862	0.866	0.972	0.972	0.972	0.97	0.972	0.996	0.993	0.969	0.863	0.866
	TY SM23	0.846	0.85	0.851	0.847	0.849	0.849	0.845	0.847	0.847	0.846	0.85	0.85	0.85	0.849	0.849	0.978	0.964	0.973	0.869	0.974	0.979	0.97	0.974	0.99	0.979	0.972	0.998	0.867	0.979	0.976	0.872	0.869	0.864	0.872	0.867	0.872	0.996	0.98	0.873	0.873	0.873	0.872	0.873	0.867	0.867	0.871	0.981	1
	TY PF12	0.846	0.85	0.851	0.847	0.849	0.849	0.845	0.847	0.847	0.846	0.85	0.85	0.85	0.849	0.849	0.978	0.964	0.973	0.869	0.974	0.979	0.97	0.974	0.99	0.979	0.972	0.998	0.867	0.979	0.976	0.872	0.869	0.864	0.872	0.867	0.872	0.996	0.98	0.873	0.873	0.873	0.872	0.873	0.867	0.867	0.871	0.981	1
	TY Tom1	0.845	0.849	0.85	0.846	0.847	0.847	0.844	0.846	0.846	0.845	0.849	0.849	0.849	0.847	0.847	0.986	0.972	0.981	0.866	0.979	0.972	0.98	0.984	0.973	0.989	0.974	0.974	0.863	0.979	0.969	0.872	0.868	0.863	0.872	0.863	0.869	0.972	0.98	0.873	0.873	0.873	0.872	0.873	0.866	0.863	0.871	0.991	0.975
[truncated: 7 more columns]

## Sheet: Table S5
	Supplementary Table S5. Codon positions detected under selective pressure using FEL, SLAC, FUBAR and MEME methods.
	Algorithm name	Selective presure	Numer of codons under selective presure	Codon
	FEL	negative	52	5*,16,18,21,24,47,49,50,53,54,65,68,69,80,84,85,94,97,99,102,103,113,122,130,137,148,150,154,164,169,172,178,184,188,197,199,208,211,213,218,228,229,237,251,255,256,262,263, 264,265,267,271
		positive	0	­
	SLAC	negative	12	49,69,85,97,130,148,184,188,211,213,263,264,267,271
		positive	0	­
	FUBAR	negative	87	5,15,16,18,19,21,24,37,39,47,49,50,53,54,55,61,65,68,69,70,71,75,80,84,85,94,97,99,100,102,103,108,113,117,122,125,130,133,134,135,137,139,141,147,148,150,152,153,154,156,164,166,169,170,172,178,180,181,184,188,194,197,199,200,202,208,211,213,214,216,217,218,221,228,229,231,232,237,251,255,256,262,263, 264, 265,267,271,
		positive	1	2
	MEME	positive	2	57.185
	*Codon numbers labbeled by red color showing codons detected to by under negative selection by three used methods
